# Supplementary material for: Dysregulated Notch Signaling in the Airway Epithelium of Children with Wheeze
Source: J Pers Med. 2021 Dec 7;11(12):1323. doi: 10.3390/jpm11121323 (PMC8707470; doi:10.3390/jpm11121323)
Supplement: Supplementary file 1 [file jpm-11-01323-s001.zip › SupplementaryMaterials_JPM_TIosifidis_CleanVersion_v3.pdf]

## Supplementary Materials

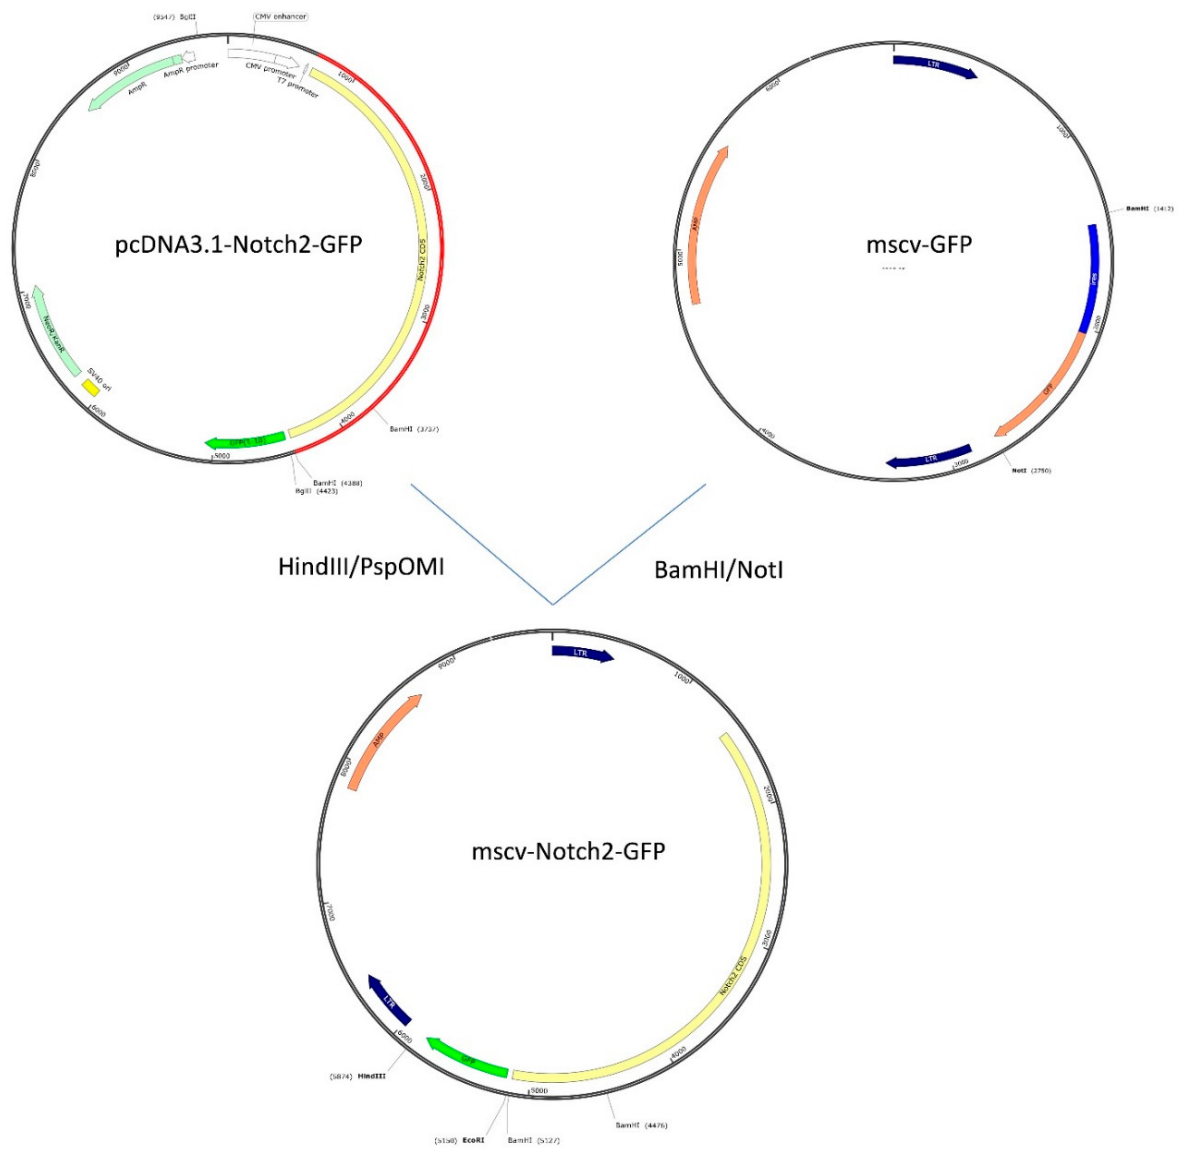

**Figure S1. Preparation of MSCV plasmid for Notch2 overexpression studies.**

The MSCV-IRES-GFP plasmid was used as a recipient plasmid following BamHI and NotI restriction digest to excise the IRES-GFP fragment. The Notch2.GFP gene was excised from the donor pcDNA3.1 Notch2.GFP plasmid by HindIII and PspOMI restriction digest. The Notch2 fragment was then gel purified, extracted using QIAquick kit and ligated to the MSCV plasmid at a ratio of 3:1 using T4 DNA ligase. Plasmid sequences were confirmed by DNA sequencing.

**A**

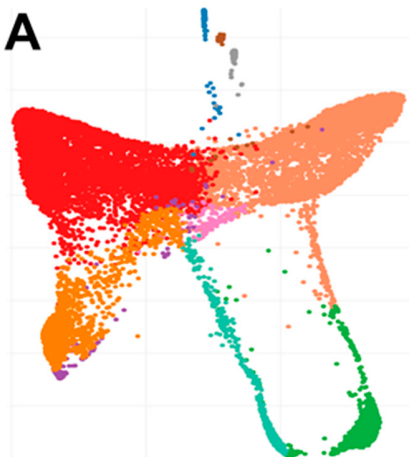

- Basal
- Secretory
- Ciliated
- Cycling Basal (homeostasis)
- Cycling Basal (regeneration)
- Krt4/13+
- Pre-ciliated
- PNEC
- Brush
- Ionocytes

|                   | Events       | %Proportion  |
|-------------------|--------------|--------------|
| Basal             | 6009         | 42.4         |
| Secretory         | 4792         | 33.8         |
| Ciliated          | 1333         | 9.4          |
| Cycling Basal (h) | 1242         | 8.8          |
| Cycling Basal (r) | 128          | 0.9          |
| KRT4/13+          | 117          | 0.8          |
| Pre-ciliated      | 366          | 2.6          |
| PNEC              | 74           | 0.5          |
| Brush             | 73           | 0.5          |
| Ionocytes         | 29           | 0.2          |
| <b>TOTAL</b>      | <b>14163</b> | <b>100.0</b> |

**B**

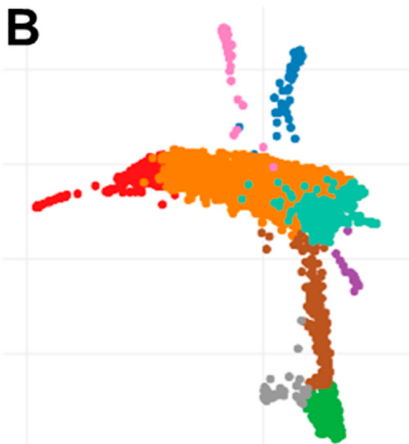

- Basal
- Secretory
- Ciliated
- Interm. basal>secr.
- Interm. secr.>cil.
- Brush+PNEC
- Ionocytes
- SLC16A7+
- FOXN4+

|                     | Events      | %Proportion  |
|---------------------|-------------|--------------|
| Basal               | 252         | 8.5          |
| Secretory           | 280         | 9.4          |
| Ciliated            | 258         | 8.7          |
| Inter. basal>secr   | 1812        | 61.0         |
| Inter. secr. > cil. | 202         | 6.8          |
| Brush+PNEC          | 56          | 1.9          |
| Ionocytes           | 45          | 1.5          |
| SLC14A7+            | 43          | 1.4          |
| FOXN4+              | 22          | 0.7          |
| <b>TOTAL</b>        | <b>2970</b> | <b>100.0</b> |

**Figure S2. Cellular composition of airway epithelium.**

(A-B) Publicly available single cell RNA-Sequencing data from mouse (A) and human (B) tracheobronchial epithelial cells were mined to identify cellular composition of airway epithelium (e.g., basal, secretory, ciliated, etc.). Number of airway epithelial cells and cell subset proportion (% total) are presented.

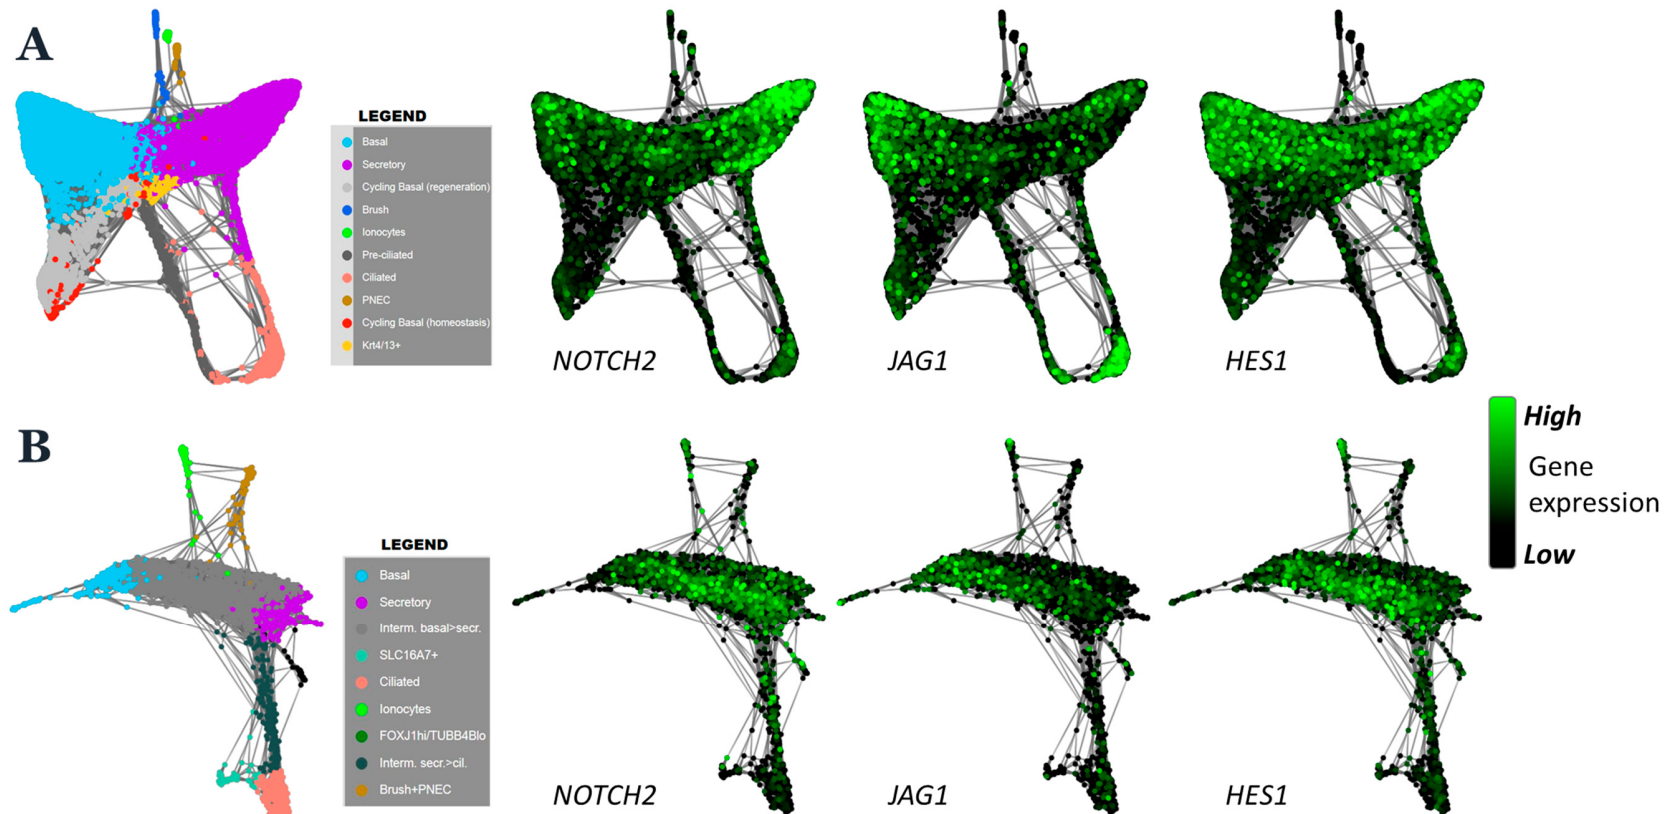

**Figure S3. Notch gene expression profiles in airway epithelial cell subsets.**

(A-B) Publicly available single cell RNA-Sequencing data from mouse (A) and human (B) tracheobronchial epithelial cells were mined to identify Notch gene expression in each airway epithelial cell subset (e.g., basal, secretory, ciliated, etc.). Specifically, gene expression of *NOTCH2*, *JAG1* and Notch signaling downstream target, *HES1*, were interrogated. Black color indicates no gene expression and green is high gene abundance.

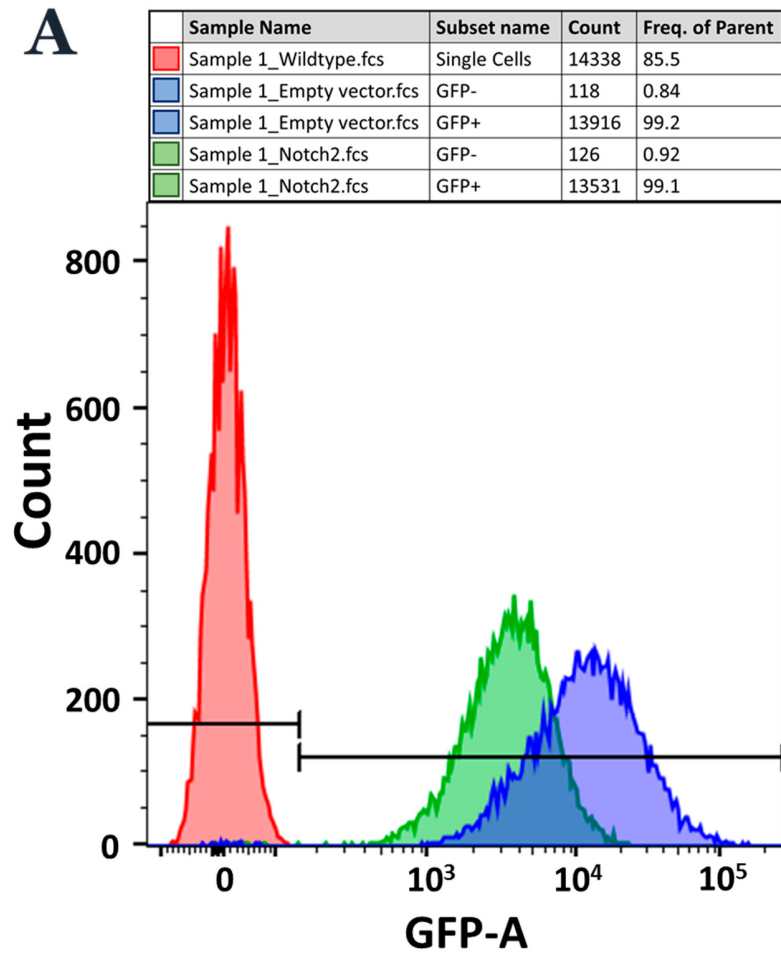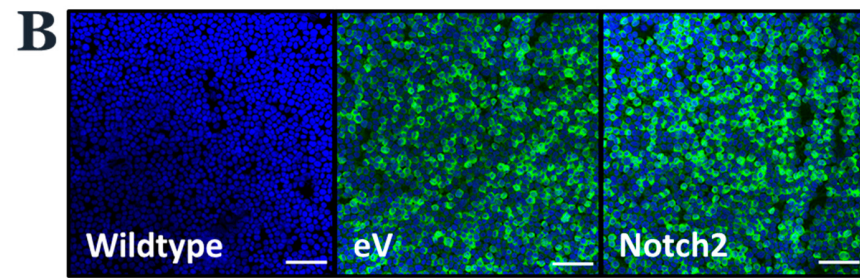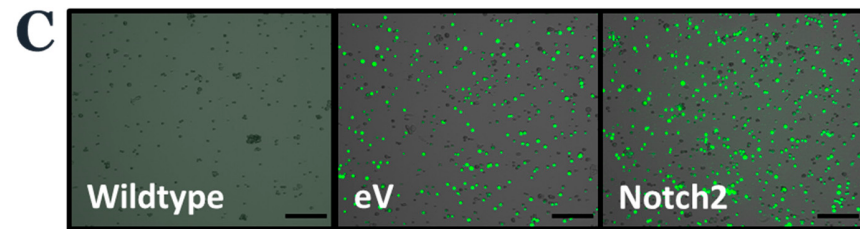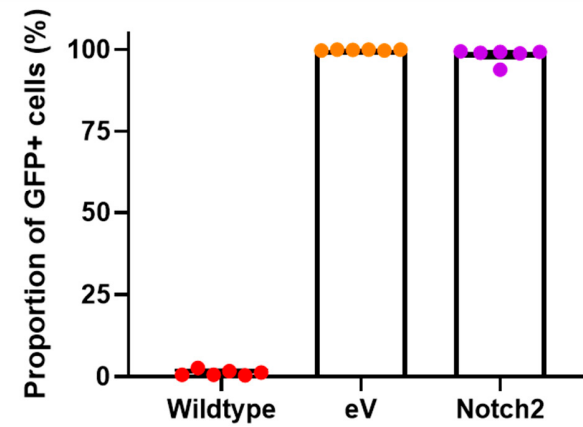

**Figure S4. Confirmation of retroviral infection and integration of MSCV-Notch2-GFP or empty vector MSCV-GFP in pAEC from children with wheeze.**

(A) Representative flow cytometry data from pAEC from one child with wheeze (total n=3 children with wheeze) showing efficient overexpression of MSCV-Notch2-GFP (99.1% positive) or empty vector MSCV-GFP (99.2% positive) compared to uninfected wildtype control cultures. (B) Fluorescent imaging of pAEC cultures (empty vector and Notch2) identified most cells to express GFP (green) and no GFP signal in the wildtype control cells. Cell nuclei were counterstained with DAPI (blue). Scale bar: 100  $\mu$ m (magnification 20x). (C) Cell counts were performed using the Tali™ Image-Based Cytometer with GFP-expressing cells shown in green. The empty vector (orange) and Notch2 (purple) overexpressing pAEC cultures included >95% GFP positive cells and wildtype (red) pAEC cultures were GFP negative as expected. Scale bar: 200  $\mu$ m (magnification 10x). Data was generated from n=6 children with wheeze.

*Study participants demographics*

**Table S4. Study participants demographics.**

|                                | <b>Non-wheeze</b> | <b>Wheeze</b>  |
|--------------------------------|-------------------|----------------|
| <b>Number</b>                  | 26                | 20             |
| <b>Male (Female)</b>           | 13 (13)           | 17 (3)         |
| <b>Mean age (range), years</b> | 5.3 (1.2-15.6)    | 5.8 (2.6-13.5) |

**Table S5. Description of study participants demographics for all figures.**

| <b>Study Participant<br/>Number</b> | <b>Respiratory Wheeze<br/>Status</b> | <b>Sex<br/>(M/F)</b> | <b>Age<br/>(years)</b> | <b>Figures(s)</b> |
|-------------------------------------|--------------------------------------|----------------------|------------------------|-------------------|
| 1                                   | Non-wheeze                           | F                    | 7.1                    | 2,3               |
| 2                                   | Non-wheeze                           | F                    | 5.2                    | 2,3               |
| 3                                   | Non-wheeze                           | M                    | 7.9                    | 2,3               |
| 4                                   | Non-wheeze                           | F                    | 10.1                   | 2,3               |
| 5                                   | Non-wheeze                           | F                    | 5.6                    | 2,3               |
| 6                                   | Non-wheeze                           | F                    | 1.9                    | 2,3               |
| 7                                   | Non-wheeze                           | M                    | 1.7                    | 2,3               |
| 8                                   | Non-wheeze                           | M                    | 9.6                    | 2,3               |
| 9                                   | Non-wheeze                           | M                    | 6.9                    | 4                 |
| 10                                  | Non-wheeze                           | F                    | 10.1                   | 4                 |
| 11                                  | Non-wheeze                           | F                    | 5.6                    | 4                 |
| 12                                  | Non-wheeze                           | F                    | 5.8                    | 4                 |
| 13                                  | Non-wheeze                           | F                    | 5.8                    | 4                 |
| 14                                  | Non-wheeze                           | F                    | 9.4                    | 4                 |
| 15                                  | Non-wheeze                           | M                    | 15.6                   | 5A                |
| 16                                  | Non-wheeze                           | F                    | 1.2                    | 5A                |
| 17                                  | Non-wheeze                           | M                    | 2.9                    | 5A                |

|    |            |   |      |       |
|----|------------|---|------|-------|
| 18 | Non-wheeze | M | 1.9  | 5A    |
| 19 | Non-wheeze | M | 2.3  | 5A,5B |
| 20 | Non-wheeze | M | 2.1  | 5B    |
| 21 | Non-wheeze | M | 3.7  | 5B    |
| 22 | Non-wheeze | M | 3.0  | 5B,6  |
| 23 | Non-wheeze | M | 3.2  | 6     |
| 24 | Non-wheeze | F | 2.6  | 6     |
| 25 | Non-wheeze | F | 2.9  | 6     |
| 26 | Non-wheeze | M | 2.8  | 5B,6  |
| 27 | Wheeze     | F | 4.2  | 2,3   |
| 28 | Wheeze     | M | 6.9  | 2,3   |
| 29 | Wheeze     | M | 4.0  | 2,3   |
| 30 | Wheeze     | M | 5.4  | 2,3   |
| 31 | Wheeze     | M | 6.9  | 2,3   |
| 32 | Wheeze     | M | 11.0 | 2,3   |
| 33 | Wheeze     | M | 13.5 | 2,3   |
| 34 | Wheeze     | M | 3.8  | 2,3   |
| 35 | Wheeze     | M | 6.9  | 4     |
| 36 | Wheeze     | F | 8.9  | 4     |
| 37 | Wheeze     | M | 3.3  | 4     |
| 38 | Wheeze     | M | 4.6  | 4     |
| 39 | Wheeze     | M | 9.8  | 4     |
| 40 | Wheeze     | M | 4.9  | 4     |
| 41 | Wheeze     | M | 5.2  | 5,6   |
| 42 | Wheeze     | M | 3.2  | 5,6   |
| 43 | Wheeze     | M | 3.1  | 5,6   |
| 44 | Wheeze     | M | 4.0  | 5,6   |
| 45 | Wheeze     | M | 2.9  | 5,6   |
| 46 | Wheeze     | F | 2.6  | 5,6   |

**Table S6. Details of reference and target genes.** List of all forward/reverse primer sets used in a Sybr Green-based qPCR. \*Housekeeping reference gene.

| Gene symbol   | Gene name         | Primer set                                                         | Amplicon length (bp) |
|---------------|-------------------|--------------------------------------------------------------------|----------------------|
| <i>18S*</i>   | 18S ribosomal RNA | Forward: TAACCCGTTGAACCCCATTC<br>Reverse: TCCAATCGGTAGTAGCGACG     | 110                  |
| <i>NOTCH1</i> | Notch receptor 1  | Forward: GGTCAATGCGAGTGGC<br>Reverse: GGCAGCAAGGCTACTGTG           | 153                  |
| <i>NOTCH2</i> | Notch receptor 2  | Forward: ACTTCCTGCCAAGCATTCC<br>Reverse: GTCCATGTCTTCAGTGAGAAC     | 346                  |
| <i>NOTCH3</i> | Notch receptor 3  | Forward: TTCTTAGATCTTGGGGGCCT<br>Reverse: GGAAGAAGGAGGTCCCAGAC     | 238                  |
| <i>NOTCH4</i> | Notch receptor 4  | Forward:<br>TTTATTATGGGTGACAGATTAGGG<br>Reverse: CACCCCGCTGATGACTC | 126                  |
| <i>JAG1</i>   | Jagged 1          | Forward: AGCAGTATTCACACTTGCTGTTG<br>Reverse: TGAAAGGCTTTTCAACCACA  | 134                  |
| <i>JAG2</i>   | Jagged 2          | Forward: AGAAGACTGCAACAGCTGCC<br>Reverse: AACAGACCTGTGGAAGAGCC     | 591                  |

|             |              |                                                                |     |
|-------------|--------------|----------------------------------------------------------------|-----|
| <i>DLL1</i> | Delta-like 1 | Forward: CAAGGATATATGCCCCAACG<br>Reverse: CAGGCAGTGCATGCTTCTTA | 250 |
| <i>DLL3</i> | Delta-like 3 | Forward: GAGACACCCAGGTCCTTTGA<br>Reverse: CAGTGGCAGATGTAGGCAGA | 152 |
| <i>DLL4</i> | Delta-like 4 | Forward: AAGGGCCTAGACCAGAGAGC<br>Reverse: CTGGGTGCGTCTCTTGCT   | 122 |
