# Supplementary material for: Dysregulated Notch Signaling in the Airway Epithelium of Children with Wheeze
Source: J Pers Med. 2021 Dec 7;11(12):1323. doi: 10.3390/jpm11121323 (PMC8707470; doi:10.3390/jpm11121323)
Supplement: Supplementary file 1 [file jpm-11-01323-s001.zip › Tables S1-S3_Reactome_networks.xlsx]

## Sheet: Table S1
Table S1. Reactome pathways associated with differentially expressed genes from lower airway epithelial samples from children with wheeze.
Pathway (Reactome)	Total	Expected	Hits	Ratio	P.Value	FDR	(-log10(FDR))
Signaling by Interleukins	116	3.13	21	18.1034	2.42e-12	3.39e-09	8.4698
NOTCH1 Intracellular Domain Regulates Transcription	50	1.35	13	26	3.83e-10	1.14e-07	6.9431
Signaling by NOTCH1 t(7;9)(NOTCH1:M1580_K2555) Translocation Mutant	74	1.99	15	20.2703	7.33e-10	1.14e-07	6.9431
Signaling by NOTCH1 in Cancer	74	1.99	15	20.2703	7.33e-10	1.14e-07	6.9431
Signaling by NOTCH1 PEST Domain Mutants in Cancer	74	1.99	15	20.2703	7.33e-10	1.14e-07	6.9431
FBXW7 Mutants and NOTCH1 in Cancer	74	1.99	15	20.2703	7.33e-10	1.14e-07	6.9431
Signaling by NOTCH1 HD Domain Mutants in Cancer	74	1.99	15	20.2703	7.33e-10	1.14e-07	6.9431
Signaling by NOTCH1 HD+PEST Domain Mutants in Cancer	74	1.99	15	20.2703	7.33e-10	1.14e-07	6.9431
Signaling by NOTCH1	74	1.99	15	20.2703	7.33e-10	1.14e-07	6.9431
Cytokine Signaling in Immune system	286	7.71	28	9.79021	1.92e-09	2.7e-07	6.56864
Signaling by SCF-KIT	142	3.83	19	13.3803	6.03e-09	7.69e-07	6.11407
Signaling by NOTCH	95	2.56	15	15.7895	2.7e-08	3.16e-06	5.50031
Constitutive Signaling by NOTCH1 PEST Domain Mutants	59	1.59	12	20.339	3.79e-08	4.09e-06	5.38828
Signalling by NGF	290	7.82	26	8.96552	4.87e-08	4.87e-06	5.31247
Constitutive Signaling by NOTCH1 HD+PEST Domain Mutants	52	1.4	11	21.1538	9.3e-08	8.69e-06	5.06098
Signaling by ERBB4	152	4.1	18	11.8421	1.07e-07	9.37e-06	5.02826
Activation of BH3-only proteins	24	0.647	8	33.3333	1.21e-07	1e-05	5
Activation of BAD and translocation to mitochondria	17	0.458	7	41.1765	1.43e-07	1.11e-05	4.95468
Downstream signal transduction	163	4.39	18	11.0429	3.13e-07	2.31e-05	4.63639
Disease	945	25.5	51	5.39683	4.02e-07	2.82e-05	4.54975
Constitutive PI3K/AKT Signaling in Cancer	89	2.4	13	14.6067	6.05e-07	4.04e-05	4.39362
Interleukin-3, 5 and GM-CSF signaling	51	1.37	10	19.6078	7.74e-07	4.77e-05	4.32148
PI3K/AKT activation	106	2.86	14	13.2075	7.82e-07	4.77e-05	4.32148
Signaling by FGFR in disease	178	4.8	18	10.1124	1.17e-06	6.81e-05	4.16685
Interleukin-2 signaling	42	1.13	9	21.4286	1.27e-06	7.15e-05	4.14569
Immune System	1140	30.7	56	4.91228	1.89e-06	0.000102	3.9914
Innate Immune System	521	14	33	6.33397	2.59e-06	0.000134	3.8729
Signaling by PDGF	189	5.1	18	9.52381	2.79e-06	0.00014	3.85387
PI3K events in ERBB4 signaling	103	2.78	13	12.6214	3.31e-06	0.000141	3.85078
PIP3 activates AKT signaling	103	2.78	13	12.6214	3.31e-06	0.000141	3.85078
PI-3K cascade	103	2.78	13	12.6214	3.31e-06	0.000141	3.85078
PI3K/AKT Signaling in Cancer	103	2.78	13	12.6214	3.31e-06	0.000141	3.85078
PI3K events in ERBB2 signaling	103	2.78	13	12.6214	3.31e-06	0.000141	3.85078
GAB1 signalosome	106	2.86	13	12.2642	4.59e-06	0.000189	3.72354
Intrinsic Pathway for Apoptosis	37	0.997	8	21.6216	4.72e-06	0.000189	3.72354
Signaling by the B Cell Receptor (BCR)	199	5.36	18	9.04523	5.83e-06	0.000227	3.64397
Signaling by EGFR in Cancer	181	4.88	17	9.39227	6.47e-06	0.000245	3.61083
Signaling by ERBB2	164	4.42	16	9.7561	7.53e-06	0.000271	3.56703
DAP12 signaling	164	4.42	16	9.7561	7.53e-06	0.000271	3.56703
Signal Transduction	1690	45.5	72	4.26036	7.81e-06	0.000274	3.56225
Signaling by FGFR1 fusion mutants	20	0.539	6	30	1e-05	0.000338	3.47108
NGF signalling via TRKA from the plasma membrane	207	5.58	18	8.69565	1.01e-05	0.000338	3.47108
CD28 co-stimulation	30	0.809	7	23.3333	1.11e-05	0.000362	3.44129
Signaling by FGFR1 mutants	31	0.836	7	22.5806	1.4e-05	0.000446	3.35067
Downstream Signaling Events Of B Cell Receptor (BCR)	173	4.66	16	9.24855	1.49e-05	0.000465	3.33255
Transcriptional activity of SMAD2/SMAD3:SMAD4 heterotrimer	43	1.16	8	18.6047	1.54e-05	0.000471	3.32698
Regulation of signaling by CBL	22	0.593	6	27.2727	1.84e-05	0.000549	3.26043
GPVI-mediated activation cascade	33	0.89	7	21.2121	2.17e-05	0.000627	3.20273
Signaling by FGFR mutants	45	1.21	8	17.7778	2.19e-05	0.000627	3.20273
Signaling by EGFR	179	4.83	16	8.93855	2.29e-05	0.000642	3.19246
DAP12 interactions	182	4.91	16	8.79121	2.82e-05	0.000774	3.11126
Hemostasis	511	13.8	30	5.87084	3.5e-05	0.000943	3.02549
Downstream signaling of activated FGFR	150	4.04	14	9.33333	4.7e-05	0.00124	2.90658
Regulation of Gene Expression by Hypoxia-inducible Factor	9	0.243	4	44.4444	5.79e-05	0.0015	2.82391
Regulation of KIT signaling	17	0.458	5	29.4118	6.4e-05	0.00163	2.78781
Integrin alphaIIb beta3 signaling	27	0.728	6	22.2222	6.52e-05	0.00163	2.78781
Signaling by TGF-beta Receptor Complex	70	1.89	9	12.8571	9.71e-05	0.00239	2.6216
Signaling by FGFR	162	4.37	14	8.64198	0.000109	0.00264	2.5784
Antigen Activates B Cell Receptor Leading to Generation of Second Messengers	32	0.863	6	18.75	0.000179	0.00424	2.37263
Interleukin-7 signaling	12	0.323	4	33.3333	0.000213	0.00491	2.30892
CD28 dependent Vav1 pathway	12	0.323	4	33.3333	0.000213	0.00491	2.30892
Platelet activation, signaling and aggregation	220	5.93	16	7.27273	0.000269	0.00609	2.21538
Downregulation of SMAD2/3:SMAD4 transcriptional activity	23	0.62	5	21.7391	0.000305	0.00667	2.17587
Growth hormone receptor signaling	23	0.62	5	21.7391	0.000305	0.00667	2.17587
Developmental Biology	417	11.2	24	5.7554	0.000312	0.00667	2.17587
Apoptosis	158	4.26	13	8.22785	0.000314	0.00667	2.17587
Platelet Aggregation (Plug Formation)	36	0.97	6	16.6667	0.000351	0.00734	2.1343
p75NTR negatively regulates cell cycle via SC1	6	0.162	3	50	0.000363	0.00748	2.1261
p75 NTR receptor-mediated signalling	85	2.29	9	10.5882	0.000434	0.00883	2.05404
Nuclear Receptor transcription pathway	53	1.43	7	13.2075	0.000498	0.00997	2.0013
GRB2:SOS provides linkage to MAPK signaling for Intergrins	15	0.404	4	26.6667	0.000552	0.0109	1.96257
Cellular responses to stress	27	0.728	5	18.5185	0.000671	0.0127	1.8962
Cellular response to hypoxia	27	0.728	5	18.5185	0.000671	0.0127	1.8962
Regulation of Hypoxia-inducible Factor (HIF) by Oxygen	27	0.728	5	18.5185	0.000671	0.0127	1.8962
p75NTR signals via NF-kB	16	0.431	4	25	0.000721	0.0135	1.86967
Toll Like Receptor 10 (TLR10) Cascade	74	1.99	8	10.8108	0.000788	0.0142	1.84771
Toll Like Receptor 5 (TLR5) Cascade	74	1.99	8	10.8108	0.000788	0.0142	1.84771
MyD88 cascade initiated on plasma membrane	74	1.99	8	10.8108	0.000788	0.0142	1.84771
SMAD2/SMAD3:SMAD4 heterotrimer regulates transcription	28	0.755	5	17.8571	0.000799	0.0142	1.84771
TRAF6 mediated induction of NFkB and MAP kinases upon TLR7/8 or 9 activation	76	2.05	8	10.5263	0.000941	0.0165	1.78252
Toll Like Receptor 7/8 (TLR7/8) Cascade	77	2.08	8	10.3896	0.00103	0.0176	1.75449
MyD88 dependent cascade initiated on endosome	77	2.08	8	10.3896	0.00103	0.0176	1.75449
Toll Like Receptor 9 (TLR9) Cascade	79	2.13	8	10.1266	0.00122	0.0205	1.68825
TRAF6 Mediated Induction of proinflammatory cytokines	62	1.67	7	11.2903	0.0013	0.0216	1.66555
MyD88:Mal cascade initiated on plasma membrane	81	2.18	8	9.87654	0.00143	0.0225	1.64782
Toll Like Receptor TLR1:TLR2 Cascade	81	2.18	8	9.87654	0.00143	0.0225	1.64782
Toll Like Receptor TLR6:TLR2 Cascade	81	2.18	8	9.87654	0.00143	0.0225	1.64782
Toll Like Receptor 2 (TLR2) Cascade	81	2.18	8	9.87654	0.00143	0.0225	1.64782
Signaling by constitutively active EGFR	19	0.512	4	21.0526	0.00144	0.0225	1.64782
CD28 dependent PI3K/Akt signaling	19	0.512	4	21.0526	0.00144	0.0225	1.64782
Toll Like Receptor 4 (TLR4) Cascade	103	2.78	9	8.73786	0.00175	0.0269	1.57025
GP1b-IX-V activation signalling	10	0.27	3	30	0.00201	0.0306	1.51428
Fcgamma receptor (FCGR) dependent phagocytosis	86	2.32	8	9.30233	0.00211	0.0314	1.50307
Signalling to STAT3	3	0.0809	2	66.6667	0.00213	0.0314	1.50307
Oxygen-dependent Asparagine Hydroxylation of Hypoxia-inducible Factor Alpha	3	0.0809	2	66.6667	0.00213	0.0314	1.50307
Costimulation by the CD28 family	68	1.83	7	10.2941	0.00223	0.0326	1.48678
Cell Cycle	508	13.7	25	4.92126	0.00227	0.0328	1.48413
Adaptive Immune System	654	17.6	30	4.58716	0.00243	0.0348	1.45842
Signaling by Hippo	22	0.593	4	18.1818	0.00255	0.0362	1.44129
Translocation of GLUT4 to the Plasma Membrane	71	1.91	7	9.85915	0.00286	0.0401	1.39686
GRB2 events in ERBB2 signaling	23	0.62	4	17.3913	0.00303	0.042	1.37675
MAP kinase activation in TLR cascade	55	1.48	6	10.9091	0.00342	0.047	1.3279
Platelet Adhesion to exposed collagen	12	0.323	3	25	0.00354	0.048	1.31876
CTLA4 inhibitory signaling	24	0.647	4	16.6667	0.00356	0.048	1.31876
Transcriptional Regulation of White Adipocyte Differentiation	56	1.51	6	10.7143	0.00375	0.05	1.30103
SHC1 events in ERBB2 signaling	25	0.674	4	16	0.00415	0.0548	1.26122
Phosphorylation of proteins involved in G1/S transition by active Cyclin E:Cdk2 complexes	4	0.108	2	50	0.00418	0.0548	1.26122
Mitotic G1-G1/S phases	140	3.77	10	7.14286	0.00439	0.0565	1.24795
Inhibition of replication initiation of damaged DNA by RB1/E2F1	13	0.35	3	23.0769	0.00451	0.0565	1.24795
NF-kB is activated and signals survival	13	0.35	3	23.0769	0.00451	0.0565	1.24795
p75NTR recruits signalling complexes	13	0.35	3	23.0769	0.00451	0.0565	1.24795
PECAM1 interactions	13	0.35	3	23.0769	0.00451	0.0565	1.24795
Cyclin D associated events in G1	41	1.11	5	12.1951	0.0046	0.0565	1.24795
G1 Phase	41	1.11	5	12.1951	0.0046	0.0565	1.24795
Cell surface interactions at the vascular wall	99	2.67	8	8.08081	0.00506	0.0617	1.20971
Activated TLR4 signalling	100	2.7	8	8	0.00538	0.065	1.18709
S Phase	122	3.29	9	7.37705	0.00549	0.0656	1.1831
G0 and Early G1	27	0.728	4	14.8148	0.00552	0.0656	1.1831
Interleukin-6 signaling	14	0.377	3	21.4286	0.00563	0.0658	1.18177
GRB2 events in EGFR signaling	14	0.377	3	21.4286	0.00563	0.0658	1.18177

## Sheet: Table S2
Table S2. Reactome pathways of the M14 module associated with Epithelial Injuryin nasal epithelial samples from children with wheeze.
Pathway (Reactome)	Total	Expected	Hits	Ratio	P.Value	FDR	(-log10(FDR))
NOTCH1 Intracellular Domain Regulates Transcription	50	0.367	6	12	1.42e-06	0.00126	2.89963
Constitutive Signaling by NOTCH1 HD+PEST Domain Mutants	52	0.382	6	11.5385	1.8e-06	0.00126	2.89963
Constitutive Signaling by NOTCH1 PEST Domain Mutants	59	0.433	6	10.1695	3.83e-06	0.00179	2.74715
Signaling by NOTCH1 t(7;9)(NOTCH1:M1580_K2555) Translocation Mutant	74	0.543	6	8.10811	1.45e-05	0.00203	2.6925
Signaling by NOTCH1 in Cancer	74	0.543	6	8.10811	1.45e-05	0.00203	2.6925
Signaling by NOTCH1 PEST Domain Mutants in Cancer	74	0.543	6	8.10811	1.45e-05	0.00203	2.6925
FBXW7 Mutants and NOTCH1 in Cancer	74	0.543	6	8.10811	1.45e-05	0.00203	2.6925
Signaling by NOTCH1 HD Domain Mutants in Cancer	74	0.543	6	8.10811	1.45e-05	0.00203	2.6925
Signaling by NOTCH1 HD+PEST Domain Mutants in Cancer	74	0.543	6	8.10811	1.45e-05	0.00203	2.6925
Signaling by NOTCH1	74	0.543	6	8.10811	1.45e-05	0.00203	2.6925
Disease	945	6.94	19	2.01058	1.72e-05	0.00219	2.65956
Downregulation of SMAD2/3:SMAD4 transcriptional activity	23	0.169	4	17.3913	2.05e-05	0.00239	2.6216
SHC1 events in ERBB2 signaling	25	0.183	4	16	2.89e-05	0.00312	2.50585
Signaling by EGFR in Cancer	181	1.33	8	4.41989	4.35e-05	0.00436	2.36051
Signaling by NOTCH	95	0.697	6	6.31579	6.04e-05	0.00565	2.24795
Transcription	149	1.09	7	4.69799	9.37e-05	0.00821	2.08566
NICD traffics to nucleus	15	0.11	3	20	0.000159	0.0117	1.93181
SHC1 events in EGFR signaling	15	0.11	3	20	0.000159	0.0117	1.93181
Notch-HLH transcription pathway	15	0.11	3	20	0.000159	0.0117	1.93181
Signaling by ERBB2	164	1.2	7	4.26829	0.000171	0.012	1.92082
Transcriptional activity of SMAD2/SMAD3:SMAD4 heterotrimer	43	0.316	4	9.30233	0.000256	0.0171	1.767
Signaling by FGFR in disease	178	1.31	7	3.93258	0.000284	0.0171	1.767
Innate Immune System	521	3.82	12	2.30326	0.000285	0.0171	1.767
Signaling by EGFR	179	1.31	7	3.91061	0.000294	0.0171	1.767
Signaling by constitutively active EGFR	19	0.139	3	15.7895	0.000331	0.0186	1.73049
GRB2 events in ERBB2 signaling	23	0.169	3	13.0435	0.000593	0.032	1.49485
Release of eIF4E	6	0.044	2	33.3333	0.000777	0.0403	1.39469
RNA Polymerase I, RNA Polymerase III, and Mitochondrial Transcription	59	0.433	4	6.77966	0.000866	0.0434	1.36251
Signalling to RAS	27	0.198	3	11.1111	0.00096	0.0464	1.33348
Platelet activation, signaling and aggregation	220	1.61	7	3.18182	0.00101	0.0473	1.32514
Signaling by FGFR	162	1.19	6	3.7037	0.0011	0.0496	1.30452
CD28 co-stimulation	30	0.22	3	10	0.00131	0.0575	1.24033
Signaling by TGF-beta Receptor Complex	70	0.514	4	5.71429	0.00165	0.0699	1.15552
S6K1-mediated signalling	9	0.066	2	22.2222	0.00184	0.0758	1.12033
Signal Transduction	1690	12.4	22	1.30178	0.00215	0.0861	1.065
Signalling to ERKs	37	0.272	3	8.10811	0.00242	0.0943	1.02549
mTORC1-mediated signalling	11	0.0807	2	18.1818	0.00278	0.105	0.978811
Developmental Biology	417	3.06	9	2.15827	0.00291	0.107	0.970616
Condensation of Prometaphase Chromosomes	12	0.0881	2	16.6667	0.00332	0.114	0.943095
Advanced glycosylation endproduct receptor signaling	12	0.0881	2	16.6667	0.00332	0.114	0.943095
Signaling by Activin	12	0.0881	2	16.6667	0.00332	0.114	0.943095
Gene Expression	1090	7.97	16	1.46789	0.00347	0.114	0.943095
Fcgamma receptor (FCGR) dependent phagocytosis	86	0.631	4	4.65116	0.0035	0.114	0.943095
Signaling by SCF-KIT	142	1.04	5	3.52113	0.00364	0.116	0.935542
NGF signalling via TRKA from the plasma membrane	207	1.52	6	2.89855	0.0038	0.118	0.928118
GRB2 events in EGFR signaling	14	0.103	2	14.2857	0.00454	0.131	0.882729
DCC mediated attractive signaling	14	0.103	2	14.2857	0.00454	0.131	0.882729
Downstream signaling of activated FGFR	150	1.1	5	3.33333	0.00461	0.131	0.882729
Signaling by Type 1 Insulin-like Growth Factor 1 Receptor (IGF1R)	94	0.69	4	4.25532	0.00481	0.131	0.882729
IGF1R signaling cascade	94	0.69	4	4.25532	0.00481	0.131	0.882729
Signalling by NGF	290	2.13	7	2.41379	0.00485	0.131	0.882729
Signaling by ERBB4	152	1.12	5	3.28947	0.00487	0.131	0.882729
Insulin receptor signalling cascade	95	0.697	4	4.21053	0.005	0.131	0.882729
Axon guidance	292	2.14	7	2.39726	0.00504	0.131	0.882729
SHC-mediated signalling	15	0.11	2	13.3333	0.00521	0.133	0.876148
Netrin-1 signaling	49	0.36	3	6.12245	0.0054	0.135	0.869666
Immune System	1140	8.35	16	1.40351	0.00558	0.137	0.863279
Downstream signal transduction	163	1.2	5	3.06748	0.00654	0.157	0.8041
Signaling by NODAL	17	0.125	2	11.7647	0.00669	0.157	0.8041
DAP12 signaling	164	1.2	5	3.04878	0.0067	0.157	0.8041
GAB1 signalosome	106	0.778	4	3.77358	0.00735	0.166	0.779892
SHC-related events	18	0.132	2	11.1111	0.00749	0.166	0.779892
SHC-related events triggered by IGF1R	18	0.132	2	11.1111	0.00749	0.166	0.779892
RNA Polymerase II Transcription	107	0.785	4	3.73832	0.00759	0.166	0.779892
RNA Polymerase I Chain Elongation	21	0.154	2	9.52381	0.0101	0.211	0.675718
SHC1 events in ERBB4 signaling	21	0.154	2	9.52381	0.0101	0.211	0.675718
DAP12 interactions	182	1.34	5	2.74725	0.0103	0.211	0.675718
Signaling by Insulin receptor	117	0.859	4	3.4188	0.0103	0.211	0.675718
Regulation of actin dynamics for phagocytic cup formation	62	0.455	3	4.83871	0.0104	0.211	0.675718
RNA Polymerase I Promoter Escape	22	0.161	2	9.09091	0.0111	0.222	0.653647
Signaling by PDGF	189	1.39	5	2.6455	0.012	0.232	0.634512
RNA Polymerase I Transcription Initiation	23	0.169	2	8.69565	0.0121	0.232	0.634512
RNA Polymerase I Transcription Termination	23	0.169	2	8.69565	0.0121	0.232	0.634512
RNA Polymerase I Promoter Clearance	24	0.176	2	8.33333	0.0131	0.246	0.609065
Signaling by BMP	24	0.176	2	8.33333	0.0131	0.246	0.609065
Costimulation by the CD28 family	68	0.499	3	4.41176	0.0133	0.246	0.609065
phospho-PLA2 pathway	2	0.0147	1	50	0.0146	0.263	0.580044
ERK2 activation	2	0.0147	1	50	0.0146	0.263	0.580044
RNA Polymerase I Transcription	26	0.191	2	7.69231	0.0153	0.269	0.570248
Transport of Mature mRNA derived from an Intron-Containing Transcript	26	0.191	2	7.69231	0.0153	0.269	0.570248
Semaphorin interactions	72	0.528	3	4.16667	0.0155	0.269	0.570248
RNA Polymerase III Transcription Initiation From Type 3 Promoter	27	0.198	2	7.40741	0.0165	0.275	0.560667
EGFR downregulation	27	0.198	2	7.40741	0.0165	0.275	0.560667
Integrin alphaIIb beta3 signaling	27	0.198	2	7.40741	0.0165	0.275	0.560667
RNA Pol II CTD phosphorylation and interaction with CE	28	0.205	2	7.14286	0.0177	0.285	0.545155
RNA Pol II CTD phosphorylation and interaction with CE	28	0.205	2	7.14286	0.0177	0.285	0.545155
SMAD2/SMAD3:SMAD4 heterotrimer regulates transcription	28	0.205	2	7.14286	0.0177	0.285	0.545155
Adaptive Immune System	654	4.8	10	1.52905	0.0185	0.292	0.534617
mTOR signalling	29	0.213	2	6.89655	0.0189	0.292	0.534617
Sema4D induced cell migration and growth-cone collapse	29	0.213	2	6.89655	0.0189	0.292	0.534617
mRNA Processing	140	1.03	4	2.85714	0.0189	0.292	0.534617
Transport of Mature Transcript to Cytoplasm	30	0.22	2	6.66667	0.0201	0.297	0.527244
mRNA Capping	30	0.22	2	6.66667	0.0201	0.297	0.527244
PKB-mediated events	30	0.22	2	6.66667	0.0201	0.297	0.527244
TGF-beta receptor signaling activates SMADs	30	0.22	2	6.66667	0.0201	0.297	0.527244
Myogenesis	31	0.227	2	6.45161	0.0214	0.306	0.514279
CDO in myogenesis	31	0.227	2	6.45161	0.0214	0.306	0.514279
Regulation of gap junction activity	3	0.022	1	33.3333	0.0219	0.306	0.514279
c-src mediated regulation of Cx43 function and closure of gap junctions	3	0.022	1	33.3333	0.0219	0.306	0.514279
Breakdown of the nuclear lamina	3	0.022	1	33.3333	0.0219	0.306	0.514279
RNA Polymerase III Transcription	33	0.242	2	6.06061	0.0241	0.328	0.484126
RNA Polymerase III Transcription Initiation	33	0.242	2	6.06061	0.0241	0.328	0.484126
RNA Polymerase III Abortive And Retractive Initiation	33	0.242	2	6.06061	0.0241	0.328	0.484126
Formation of the Early Elongation Complex	34	0.25	2	5.88235	0.0255	0.332	0.478862
Formation of the HIV-1 Early Elongation Complex	34	0.25	2	5.88235	0.0255	0.332	0.478862
Sema4D in semaphorin signaling	34	0.25	2	5.88235	0.0255	0.332	0.478862
Thrombin signalling through proteinase activated receptors (PARs)	34	0.25	2	5.88235	0.0255	0.332	0.478862
IRS-mediated signalling	87	0.638	3	3.44828	0.0256	0.332	0.478862
Signal transduction by L1	35	0.257	2	5.71429	0.0269	0.342	0.465974
Platelet degranulation	89	0.653	3	3.37079	0.0271	0.342	0.465974
Constitutive PI3K/AKT Signaling in Cancer	89	0.653	3	3.37079	0.0271	0.342	0.465974
IRS-related events	90	0.66	3	3.33333	0.0279	0.342	0.465974
mRNA 3'-end processing	36	0.264	2	5.55556	0.0284	0.342	0.465974
Mitotic Prophase	36	0.264	2	5.55556	0.0284	0.342	0.465974
Platelet Aggregation (Plug Formation)	36	0.264	2	5.55556	0.0284	0.342	0.465974
Post-Elongation Processing of Intron-Containing pre-mRNA	36	0.264	2	5.55556	0.0284	0.342	0.465974
IRS-related events triggered by IGF1R	91	0.668	3	3.2967	0.0287	0.342	0.465974
SHC activation	4	0.0294	1	25	0.029	0.342	0.465974
Cell Cycle, Mitotic	411	3.02	7	1.70316	0.0291	0.342	0.465974
Cell Cycle	508	3.73	8	1.5748	0.03	0.351	0.454693

## Sheet: Table S3
Table S3. Reactome pathways of the M20 module associated with Epithelial Integrityin nasal epithelial samples from children with wheeze.
Pathway (Reactome)	Total	Expected	Hits	Ratio	P.Value	FDR	(-log10(pvalue))
Formyl peptide receptors bind formyl peptides and many other ligands	6	0.0252	2	33.3333	0.000252	0.353	3.5986
Hemostasis	511	2.14	8	1.56556	0.000878	0.615	3.05651
Platelet activation, signaling and aggregation	220	0.923	5	2.27273	0.00196	0.773	2.70774
Semaphorin interactions	72	0.302	3	4.16667	0.00325	0.773	2.48812
Nef-mediates down modulation of cell surface receptors by recruiting them to clathrin adapters	24	0.101	2	8.33333	0.00442	0.773	2.35458
TRIF-mediated TLR3/TLR4 signaling	87	0.365	3	3.44828	0.00553	0.773	2.25727
MyD88-independent cascade	88	0.369	3	3.40909	0.00571	0.773	2.24336
Toll Like Receptor 3 (TLR3) Cascade	88	0.369	3	3.40909	0.00571	0.773	2.24336
Platelet degranulation	89	0.373	3	3.37079	0.00589	0.773	2.22988
Tight junction interactions	29	0.122	2	6.89655	0.00642	0.773	2.19246
Sema4D induced cell migration and growth-cone collapse	29	0.122	2	6.89655	0.00642	0.773	2.19246
Response to elevated platelet cytosolic Ca2+	94	0.394	3	3.19149	0.00686	0.773	2.16368
The role of Nef in HIV-1 replication and disease pathogenesis	31	0.13	2	6.45161	0.00732	0.773	2.13549
Activated TLR4 signalling	100	0.419	3	3	0.00814	0.773	2.08938
Sema4D in semaphorin signaling	34	0.143	2	5.88235	0.00876	0.773	2.0575
Toll Like Receptor 4 (TLR4) Cascade	103	0.432	3	2.91262	0.00883	0.773	2.05404
Regulation of gap junction activity	3	0.0126	1	33.3333	0.0125	0.925	1.90309
c-src mediated regulation of Cx43 function and closure of gap junctions	3	0.0126	1	33.3333	0.0125	0.925	1.90309
Fibronectin matrix formation	3	0.0126	1	33.3333	0.0125	0.925	1.90309
Toll-Like Receptors Cascades	123	0.516	3	2.43902	0.0143	1	1.84466
Phosphorylation of proteins involved in G1/S transition by active Cyclin E:Cdk2 complexes	4	0.0168	1	25	0.0167	1	1.77728
Axonal growth stimulation	4	0.0168	1	25	0.0167	1	1.77728
G2 Phase	5	0.021	1	20	0.0208	1	1.68194
RORA Activates Circadian Expression	5	0.021	1	20	0.0208	1	1.68194
Nucleotide-binding domain, leucine rich repeat containing receptor (NLR) signaling pathways	55	0.231	2	3.63636	0.022	1	1.65758
MAP kinase activation in TLR cascade	55	0.231	2	3.63636	0.022	1	1.65758
Golgi Associated Vesicle Biogenesis	57	0.239	2	3.50877	0.0235	1	1.62893
Cell-cell junction organization	60	0.252	2	3.33333	0.0258	1	1.58838
TRAF6 Mediated Induction of proinflammatory cytokines	62	0.26	2	3.22581	0.0275	1	1.56067
trans-Golgi Network Vesicle Budding	64	0.268	2	3.125	0.0291	1	1.53611
Clathrin derived vesicle budding	64	0.268	2	3.125	0.0291	1	1.53611
RIG-I/MDA5 mediated induction of IFN-alpha/beta pathways	67	0.281	2	2.98507	0.0317	1	1.49894
Sema4D mediated inhibition of cell attachment and migration	8	0.0335	1	12.5	0.0331	1	1.48017
Nef Mediated CD4 Down-regulation	9	0.0377	1	11.1111	0.0371	1	1.43063
Axonal growth inhibition (RHOA activation)	9	0.0377	1	11.1111	0.0371	1	1.43063
Import of palmitoyl-CoA into the mitochondrial matrix	9	0.0377	1	11.1111	0.0371	1	1.43063
Toll Like Receptor 10 (TLR10) Cascade	74	0.31	2	2.7027	0.038	1	1.42022
Toll Like Receptor 5 (TLR5) Cascade	74	0.31	2	2.7027	0.038	1	1.42022
MyD88 cascade initiated on plasma membrane	74	0.31	2	2.7027	0.038	1	1.42022
TRAF6 mediated induction of NFkB and MAP kinases upon TLR7/8 or 9 activation	76	0.319	2	2.63158	0.0399	1	1.39903
Toll Like Receptor 7/8 (TLR7/8) Cascade	77	0.323	2	2.5974	0.0409	1	1.38828
MyD88 dependent cascade initiated on endosome	77	0.323	2	2.5974	0.0409	1	1.38828
p75NTR regulates axonogenesis	10	0.0419	1	10	0.0412	1	1.3851
COPI Mediated Transport	10	0.0419	1	10	0.0412	1	1.3851
Golgi to ER Retrograde Transport	10	0.0419	1	10	0.0412	1	1.3851
Endosomal/Vacuolar pathway	10	0.0419	1	10	0.0412	1	1.3851
Activation of the AP-1 family of transcription factors	10	0.0419	1	10	0.0412	1	1.3851
Toll Like Receptor 9 (TLR9) Cascade	79	0.331	2	2.53165	0.0428	1	1.36856
Immunoregulatory interactions between a Lymphoid and a non-Lymphoid cell	80	0.335	2	2.5	0.0438	1	1.35853
MyD88:Mal cascade initiated on plasma membrane	81	0.34	2	2.46914	0.0448	1	1.34872
Toll Like Receptor TLR1:TLR2 Cascade	81	0.34	2	2.46914	0.0448	1	1.34872
Toll Like Receptor TLR6:TLR2 Cascade	81	0.34	2	2.46914	0.0448	1	1.34872
Toll Like Receptor 2 (TLR2) Cascade	81	0.34	2	2.46914	0.0448	1	1.34872
RIP-mediated NFkB activation via DAI	11	0.0461	1	9.09091	0.0452	1	1.34486
Meiotic Recombination	84	0.352	2	2.38095	0.0479	1	1.31966
Integrin cell surface interactions	85	0.356	2	2.35294	0.0489	1	1.31069
Advanced glycosylation endproduct receptor signaling	12	0.0503	1	8.33333	0.0492	1	1.30803
NF-kB activation through FADD/RIP-1 pathway mediated by caspase-8 and -10	12	0.0503	1	8.33333	0.0492	1	1.30803
